# Supplementary material for: Structural and functional organization of RNA regulons in the post-transcriptional regulatory network of yeast
Source: PubMed Central journal article supplement — Nucleic Acids Res. 2011 Aug 11;39(21):9108–17. doi: 10.1093/nar/gkr661 (PMC3241661; doi:10.1093/nar/gkr661), 2011-08-11
Supplement: supp_gkr661_nar-00594-a-2011-File009.pdf [file supp_gkr661_nar-00594-a-2011-File009.pdf]

Supporting online material for:  
Structural and functional organization of RNA regulons in the  
yeast posttranscriptional regulatory network

Anagha Joshi, Yves Van de Peer, Tom Michoel

**1 Evaluating transcriptome and translome clusters with respect to protein complexes**

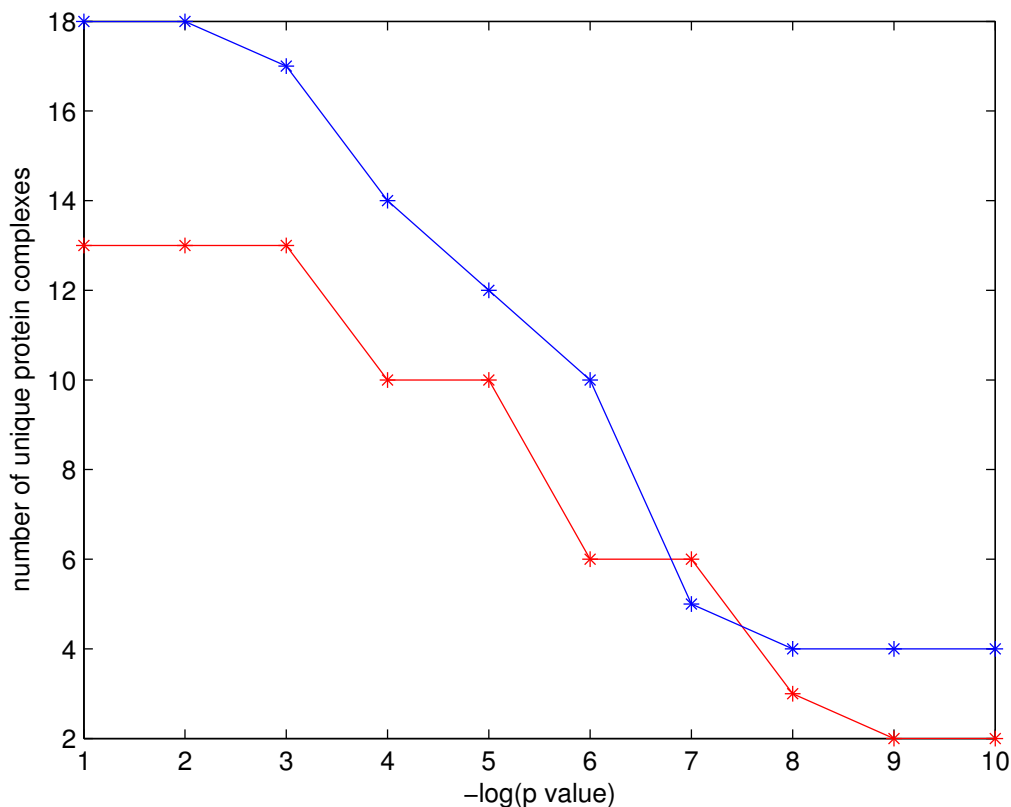

Figure S1: At different  $P$ -value cutoffs ( $x$ -axis), the total number of protein complexes enriched in transcriptome clusters (red) and translome clusters (blue), cfr. Figure 1 in the paper.

## 2 Overrepresented functional categories for translatoe clusters ( $P < 0.001$ )

**Class I:** Biosynthesis of histidine, biosynthesis of isoleucine, sugar, glucoside, pylyol and carboxylate anabolism and catabolism, metabolism of vitamins, cofactors and prosthetic groups, metabolism of energy reserves, heavy metal binding, sugar transport, cellular import, inorganic chemical agent resistance, detoxification.

**Class II:** Biosynthesis of histidine, leucine, lysine and argenine, metabolism of porphyrins, urea, aspartate and methionine, catabolism of nitrogenous compounds, sulphate assimilation, alcohol fermentation, rRNA processing, rRNA modification, ribosome biogenesis, ribosomal proteins, translation initiation, translational control, RNA binding, GTP binding, NAD/NADP binding, heat shock response, electron transport, anion transport.

**Class III:** Metabolism of aspartate, degradation of asparagine, nitrogen, sulphur and selenium metabolism, peptidoglycan anabolism, glycolysis and gluconeogenesis, electron transport and membrane associated energy conservation, DNA topology, aminoacyl tRNA synthetases, N-diercted glucosylation, deglucosylation, RNA binding, electron transport, unfolded protein response, nutrient starvation response, homeostasis of protons.

### 3 Translatome cluster 24 involved in translational elongation

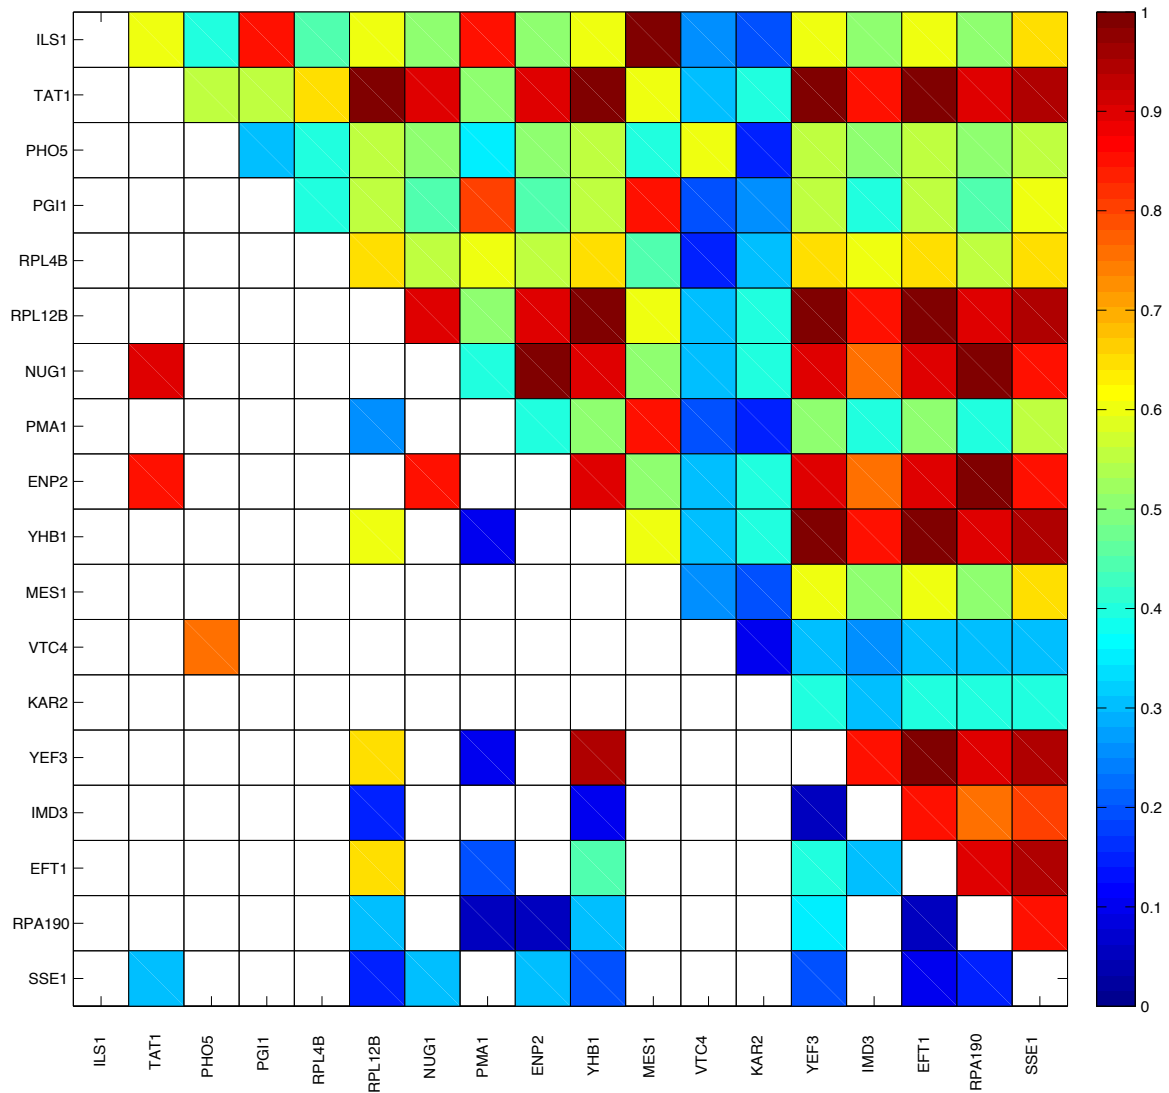

Figure S2: Translatome cluster 24 is a class III cluster involved in translational elongation. The genes in this clusters are coexpressed in translatome data (upper diagonal) but not in transcriptome data (lower diagonal); see also Figure 3 in the paper and the Supplementary Website.

## 4 FANMOD output

| ID | Adj                                                                                 | Frequency [Original] | Mean-Freq [Random] | Standard-Dev [Random] | Z-Score | p-Value |
|----|-------------------------------------------------------------------------------------|----------------------|--------------------|-----------------------|---------|---------|
| 46 | 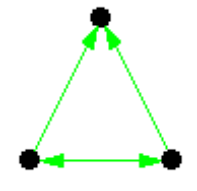   | 0.022948%            | 0.0099661%         | 1.1121e-05            | 11.674  | 0       |
| 38 |    | 0.033925%            | 0.023687%          | 1.1109e-05            | 9.2161  | 0       |
| 6  |   | 85.726%              | 85.69%             | 5.8415e-05            | 6.1406  | 0       |
| 12 |  | 0.33833%             | 0.33216%           | 2.363e-05             | 2.6084  | 0.002   |
| 36 |  | 0.33026%             | 0.32508%           | 2.4443e-05            | 2.1212  | 0.017   |

Figure S3: FANMOD output showing all network motifs with  $P < 0.05$  and occurring at least 100 times in the integrated network of transcriptional (black) and posttranscriptional (green) interactions.

## 5 Clusters combinatorially regulated at transcriptional and posttranscriptional levels

Table S1: Combinatorially regulated translome clusters overlapping significantly ( $P < 10^{-5}$ ) with known targets of at least one TF and at least one RBP.

| TS cluster | Transcription factors | RNA binding proteins |
|------------|-----------------------|----------------------|
| 2          | RAP1,FHL1             | PAB1                 |
| 5          | GAT3,GCR2,RAP1,FHL1   | PAB1                 |
| 9          | SFL1                  | ACO1                 |
| 16         | RAP1,FHL1             | PAB1                 |
| 19         | STB6                  | SIK1                 |
| 21         | GCN4                  | HRB1                 |
| 24         | THO2                  | SCP160,BFR1          |
| 31         | RAP1,FHL1             | PAB1,CBC2            |
| 42         | HIR2                  | PAB1,NSR1,PUF2       |
| 83         | RGM1                  | SIK1                 |
| 98         | ARO80                 | YLL032C              |

## 6 Median of diverse genomewide properties of gene clusters regulated by each network motif

Table S2: Median value of diverse genomewide properties of gene clusters regulated by each network motif. The bold numbers are significantly higher or lower compared to the other motifs.

|             | mRNA level  | mRNA level  | Protein abundance | Protein noise |
|-------------|-------------|-------------|-------------------|---------------|
| TF direct   | 1.60        | 2.51        | 4050              | 17.84         |
| RBP direct  | 1.83        | 3.41        | 5440              | 17.75         |
| RBP FBL     | <b>2.70</b> | <b>7.24</b> | <b>9540</b>       | <b>16.19</b>  |
| TF FFL      | 1.72        | 2.60        | 5350              | 16.79         |
| RBP FFL     | 2.12        | 4.71        | 7380              | 17.44         |
| Mixed bifan | 1.94        | 3.78        | 6290              | 17.44         |

## 7 Overrepresented functional categories for RBP feedback loops ( $P < 0.001$ )

Peptidoglycan anabolism, pyruvate dehydrogenase complex, rRNA processing, rRNA modification, ribosomal proteins, translation initiation, aminoacyl tRNA synthetases, N-directed glycosylation, deglycosylation, RNA binding, GTP binding, electron transport, homeostasis of protons.
